# Supplementary material for: One-pot synthesized Cu/Au/Pt trimetallic nanoparticles as a novel enzyme mimic for biosensing applications
Source: Royal Society of Chemistry journal article supplement (doi:10.1039/c9ra00603f), 2019-01-01
Supplement: c9ra00603f1.pdf [file c9ra00603f1.pdf]

## Supporting Information

### **One-pot synthesized Cu/Au/Pt trimetallic nanoparticles as a novel enzyme mimic for biosensing applications**

Pian Wu,<sup>a</sup> Ping Ding,<sup>a</sup> Xiaosheng Ye,<sup>\*ab</sup> Lei Li,<sup>c</sup> Xiaoxiao He<sup>b</sup> and Kemin Wang<sup>b</sup>

<sup>a</sup> XiangYa School of Public Health, Central South University, Changsha 410078, Hunan, China.

<sup>b</sup> State Key Laboratory of Chemo/Biosensing and Chemometrics, College of Chemistry and Chemical Engineering, Institute of Biology, Hunan University, Key Laboratory for Bio-Nanotechnology and Molecular Engineering of Hunan Province, Changsha 410082, Hunan, China.

<sup>c</sup> Center for Global Health, School of Public Health, Nanjing Medical University, Nanjing, 211166, China

\*To whom correspondence should be addressed. Tel: 86-731-84805462; Fax: 86-731-84805462; E-mail: yexiaosheng@csu.edu.cn.

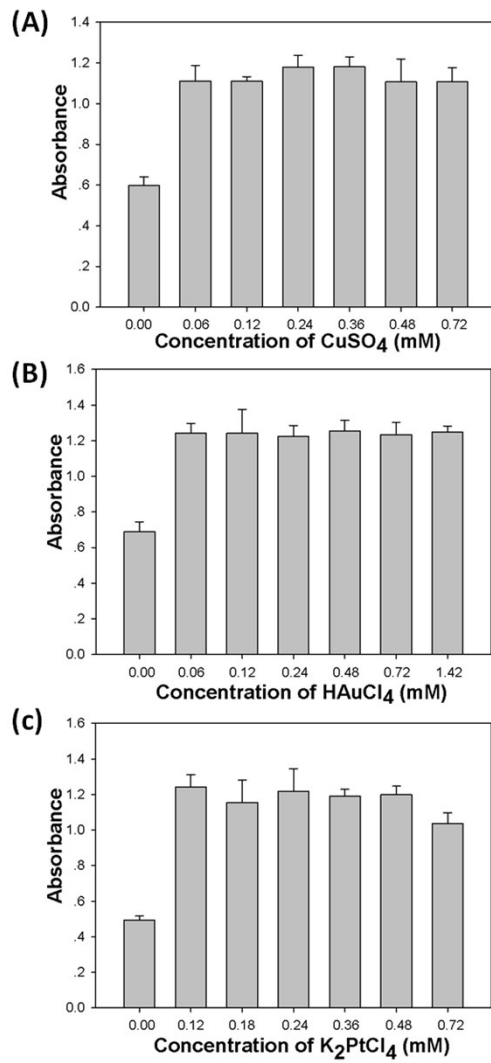

**Fig. S1** The effects of the contents of (A)  $\text{CuSO}_4$ , (B)  $\text{HAuCl}_4$  and (C)  $\text{K}_2\text{PtCl}_4$  on the properties of Cu/Au/Pt TNPs.

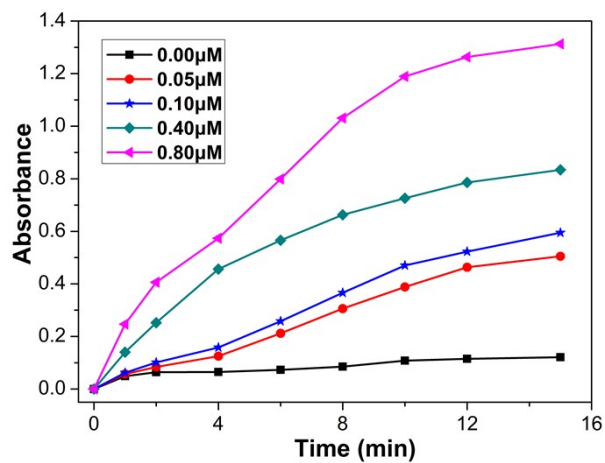

**Fig. S2** The concentration dependence of  $H_2O_2$  in the presence of Cu/Au/Pt TNPs.

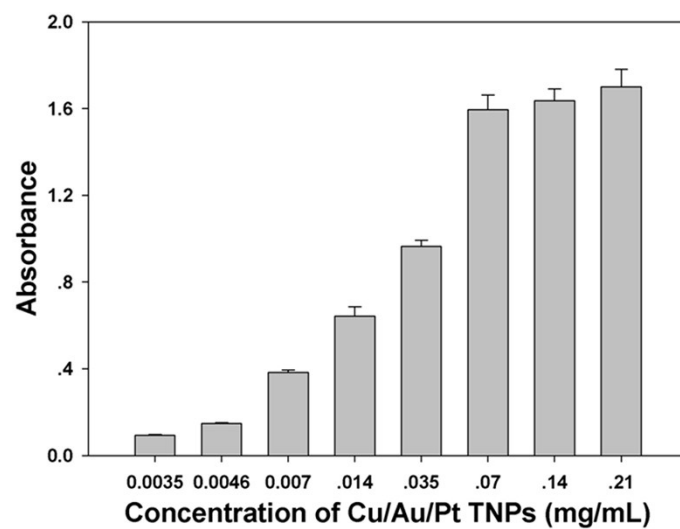

**Fig. S3** The optimization of different concentrations of Cu/Au/Pt TNPs for TMB-H<sub>2</sub>O<sub>2</sub> reaction.

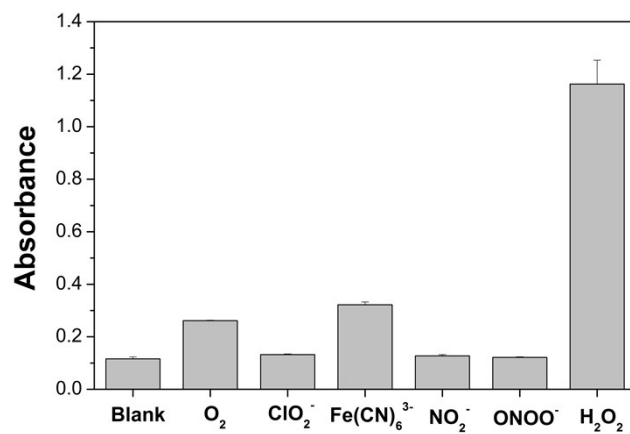

**Fig. S4** Absorption at 650 nm of different substrate (dissolved O<sub>2</sub>, ClO<sub>2</sub><sup>-</sup>, Fe(CN)<sub>6</sub><sup>3-</sup>, NO<sub>2</sub><sup>-</sup>, ONOO<sup>-</sup> and H<sub>2</sub>O<sub>2</sub>) in the presence of the same amount of TMB and Cu/Au/Pt TNPs.

**Table S1** Performance comparison of the proposed Cu/Au/Pt TNPs with other H<sub>2</sub>O<sub>2</sub> sensors

| <b>Enzyme mimics</b>                       | <b>Linear range</b>               | <b>LOD</b>    | <b>Ref.</b> |
|--------------------------------------------|-----------------------------------|---------------|-------------|
| H-MOFs                                     | 0-800 $\mu$ M                     | 1.0 $\mu$ M   | [1]         |
| glycine-MIL-53(Fe)                         | 0.10-10 $\mu$ M                   | 0.049 $\mu$ M | [2]         |
| Fe <sub>3</sub> O <sub>4</sub> /graphene   | 0.8-334.4                         | 0.078 $\mu$ M | [3]         |
| Au/Pt NRs                                  | 1-250 $\mu$ M                     | 0.04 $\mu$ M  | [4]         |
| Au-Ag/C NC                                 | 0.8-90 $\mu$ M 90-<br>500 $\mu$ M | 0.3 $\mu$ M   | [5]         |
| Pt-Au/reduced graphene sheets              | 1–1780<br>1780–16800 $\mu$ M      | 0.31 $\mu$ M  | [6]         |
| Cu-SBA-15                                  | 0.8 - 60 mM                       | 3.7 $\mu$ M   | [7]         |
| Ni(OH) <sub>2</sub> /RGO/Cu <sub>2</sub> O | 0.5 -7.5 mM                       | 0.20 $\mu$ M  | [8]         |
| Cu/Au/Pt TNPs                              | 0-1000 nM                         | 0.017 $\mu$ M | This work   |

## References

1. Y. Yin, C. Gao, Q. Xiao, G. Lin, Z. Lin, Z. Cai and H. Yang, *ACS Appl. Mater. Interfaces*, 2016, 8, 29052-29061.
2. W. Dong, L. Yang and Y. Huang, *Talanta*, 2017, 67, 359-366.
3. Y. Zhao, D. Huo, J. Bao, M. Yang, M. Chen, J. Hou, H. Fa and C. Hou, *Sensor Actuat. B-Chem.*, 2017, 244, 1037-1044.
4. Y. Sun, R. Wang, X. Liu, G. Shan, Y. Chen, T. Tong and Y. Liu, *Microchim. Acta.*, 2018, 185, 445.
5. L. Zhang, W. Hou, Q. Lu, M. Liu, C. Chen, Y. Zhang and S. Yao, *Anal. Chim. Acta.*, 2016, 947, 23-31.
6. G. X. Yu, W. X. Wu, X. Q. Pan, Q. Zhao, X. Y. Wei and Q. Lu, *Sensors*, 2015, 15, 2709-2722.
7. J. Mu, Y. He and Y. Wang, *Talanta*, 2016, 148, 22-28.
8. X. Wu, F. Li, C. Zhao and X. Qian, *Sensor Actuat. B-Chem.*, 2018, 274, 163-171.
